# Supplementary material
Source: PubMed Central journal article supplement (PMC6965762)
Supplement: ijcep0010-10611-f6.pdf [file ijcep0010-10611-f6.pdf]

## Original Data

|         | Repeat | Figure 1 CT value |       |       |       |       |       | Relative fold |
|---------|--------|-------------------|-------|-------|-------|-------|-------|---------------|
|         |        | MALAT1            |       |       | GAPDH |       |       |               |
| Control | 1      | 26.12             | 26.32 | 26.88 | 17.59 | 17.09 | 17.1  | 1.041494      |
|         | 2      | 26.12             | 26.32 | 25.88 | 16.68 | 17.38 | 16.52 | 0.994462      |
|         | 3      | 25.58             | 25.38 | 24.02 | 16.25 | 15.25 | 15.55 | 0.95175       |
| IDDD    | 1      | 28.86             | 27.36 | 28.44 | 17.82 | 17.32 | 17.38 | 0.359814      |
|         | 2      | 29.55             | 30.05 | 29.55 | 15.95 | 16.45 | 15.15 | 0.040442      |
|         | 3      | 27.2              | 27.59 | 28.7  | 16.96 | 16.46 | 17.14 | 0.299782      |

|               | Repeat | Figure 2 CT value |       |       |       |       |       | Relative fold |
|---------------|--------|-------------------|-------|-------|-------|-------|-------|---------------|
|               |        | MALAT1            |       |       | GAPDH |       |       |               |
| IDDD          | 1      | 27.91             | 28.11 | 27.59 | 17.07 | 17.07 | 16.63 | 1.026458      |
|               | 2      | 26.79             | 27.19 | 26.11 | 15.98 | 16.58 | 15.22 | 1.089356      |
|               | 3      | 27.02             | 27.52 | 27.78 | 16.92 | 16.82 | 16.98 | 0.990577      |
| Empty plasmid | 1      | 27.18             | 27.88 | 26.92 | 17.36 | 16.96 | 16.54 | 1.025393      |
|               | 2      | 28.42             | 29.02 | 28.48 | 18    | 17.72 | 17.88 | 0.991051      |
|               | 3      | 27.8              | 28.22 | 28.03 | 17.37 | 17.07 | 17.73 | 0.962775      |
| MALAT1        | 1      | 27.45             | 27.55 | 26.75 | 18.77 | 18.17 | 18.03 | 1.007765      |
|               | 2      | 27.33             | 27.73 | 27.47 | 18.22 | 18.82 | 18.88 | 0.996822      |
|               | 3      | 26.24             | 26.94 | 26.86 | 17.89 | 17.29 | 17.91 | 0.965382      |

|        | Repeat | Figure 3 OD value  |       |       | Cell proliferation |
|--------|--------|--------------------|-------|-------|--------------------|
|        |        | Normalized control | 1     | 0.788 |                    |
|        | 2      | 0.755              | 0.715 | 0.823 | 100.00%            |
|        | 3      | 0.817              | 0.852 | 0.777 | 100.00%            |
| IDDD   | 1      | 0.719              | 0.714 | 0.698 | 89.99%             |
|        | 2      | 0.619              | 0.595 | 0.621 | 80.03%             |
|        | 3      | 0.696              | 0.702 | 0.682 | 85.04%             |
| Empty  | 1      | 0.652              | 0.685 | 0.747 | 88.01%             |
|        | 2      | 0.599              | 0.595 | 0.617 | 78.98%             |
|        | 3      | 0.642              | 0.650 | 0.592 | 77.02%             |
| MALAT1 | 1      | 1.188              | 1.206 | 1.111 | 148.02%            |
|        | 2      | 1.128              | 1.120 | 1.008 | 142.00%            |
|        | 3      | 1.135              | 1.088 | 1.129 | 137.04%            |

## LncRNA MALAT1 in IDDD

| Figure 4 OD value  |   |       | Caspase activity |       |        |
|--------------------|---|-------|------------------|-------|--------|
| Normalized control | 1 | 0.063 | 0.053            | 0.056 | 100.00 |
|                    | 2 | 0.061 | 0.057            | 0.063 | 100.00 |
|                    | 3 | 0.064 | 0.059            | 0.056 | 100.00 |
| IDDD               | 1 | 0.290 | 0.294            | 0.278 | 501.16 |
|                    | 2 | 0.321 | 0.311            | 0.311 | 520.99 |
|                    | 3 | 0.327 | 0.333            | 0.325 | 550.28 |
| Empty              | 1 | 0.296 | 0.291            | 0.310 | 521.51 |
|                    | 2 | 0.289 | 0.288            | 0.311 | 490.61 |
|                    | 3 | 0.278 | 0.274            | 0.290 | 470.39 |
| MALAT1             | 1 | 0.190 | 0.193            | 0.187 | 331.40 |
|                    | 2 | 0.175 | 0.180            | 0.188 | 300.00 |
|                    | 3 | 0.164 | 0.162            | 0.157 | 269.83 |

| Figure 5 IL-1 |   |       |          |       | Standard |       | pg/ml |
|---------------|---|-------|----------|-------|----------|-------|-------|
|               |   |       | OD value |       |          |       |       |
| IDDD          | 1 | 0.579 | 0.607    | 0.557 | pg/ml    | OD    | 547   |
|               | 2 | 0.545 | 0.522    | 0.601 | 0        | 0     | 522   |
|               | 3 | 0.571 | 0.562    | 0.502 | 18.64    | 0.047 | 511   |
| Empty         | 1 | 0.544 | 0.544    | 0.520 | 37.92    | 0.084 | 502   |
|               | 2 | 0.553 | 0.561    | 0.443 | 76.5     | 0.173 | 485   |
|               | 3 | 0.439 | 0.467    | 0.597 | 153.85   | 0.346 | 467   |
| MALAT1        | 1 | 0.245 | 0.310    | 0.291 | 319.36   | 0.658 | 248   |
|               | 2 | 0.251 | 0.236    | 0.245 | 627.8    | 1.312 | 210   |
|               | 3 | 0.219 | 0.247    | 0.317 | 1258.75  | 2.42  | 227   |

| Figure 5 IL-6 |   |       |          |       | Standard |       | pg/ml |
|---------------|---|-------|----------|-------|----------|-------|-------|
|               |   |       | OD value |       |          |       |       |
| IDDD          | 1 | 0.508 | 0.514    | 0.550 | pg/ml    | OD    | 445   |
|               | 2 | 0.454 | 0.582    | 0.482 | 0        | 0     | 427   |
|               | 3 | 0.488 | 0.516    | 0.448 | 17.82    | 0.089 | 405   |
| Empty         | 1 | 0.501 | 0.534    | 0.432 | 36.37    | 0.14  | 410   |
|               | 2 | 0.506 | 0.445    | 0.465 | 78.24    | 0.218 | 393   |
|               | 3 | 0.516 | 0.434    | 0.400 | 155.5    | 0.356 | 371   |
| MALAT1        | 1 | 0.321 | 0.300    | 0.342 | 310.39   | 0.587 | 242   |
|               | 2 | 0.270 | 0.287    | 0.268 | 604.91   | 1.152 | 196   |
|               | 3 | 0.311 | 0.319    | 0.288 | 1127.7   | 1.978 | 227   |
